# Supplementary material for: Photo-crosslinked Diels–Alder and thiol–ene polymer networks
Source: Royal Society of Chemistry journal article supplement (doi:10.1039/d4ra08072f), 2025-01-01
Supplement: d4ra08072f1.pdf [file d4ra08072f1.pdf]

## Photo-Crosslinked Diels-Alder and Thiol-ene Polymer Networks

Masa Alrefai, Milan Maric\*

### Supporting Information

|                                                                                                                                                                                           |          |
|-------------------------------------------------------------------------------------------------------------------------------------------------------------------------------------------|----------|
| <i>Figure S1. <sup>1</sup>H NMR traces of poly(EGDEMA) synthesized by ICAR ATRP. ....</i>                                                                                                 | <i>2</i> |
| <i>Figure S2. <sup>1</sup>H NMR traces of poly(EGDEMA-co-FMA-co-C13MA) synthesized by ICAR ATRP. ....</i>                                                                                 | <i>2</i> |
| <i>Figure S3. GPC traces for Ter1, Ter2 and Ter3. ....</i>                                                                                                                                | <i>3</i> |
| <i>Figure S4. FTIR traces for crosslinked Ter2 sample with dual curing and BM:FMA loadings of 0.1 and TC:EGDEMA loading of 0.1. ....</i>                                                  | <i>3</i> |
| <i>Figure S5. Gel content chart for UV-cured crosslinked Ter3 samples with single and dual curing and BM:FMA loadings of 0.1 and 0.2 ....</i>                                             | <i>3</i> |
| <i>Figure S6. DMA test results for heating of single and dual crosslinked samples, T3A and T3B respectively, with BM:FMA ratio of 0.1; the reported values for G' G'' are in Pa. ....</i> | <i>4</i> |

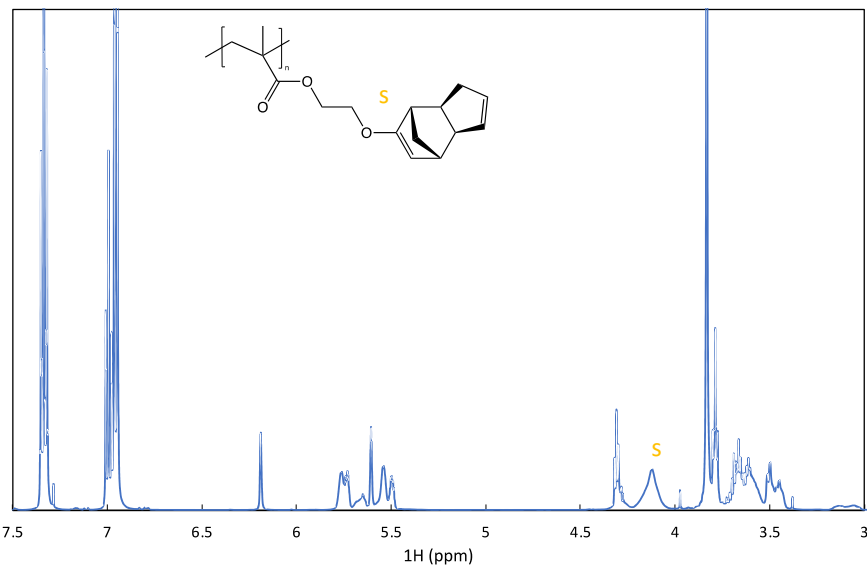

Figure S1.  $^1\text{H}$  NMR traces of poly(EGDEMA) synthesized by ICAR ATRP: 6.18-6.22 & 5.58-5.60 (m, 1H,  $-\text{CH}=\text{CH}-$ , EGDEMA monomer) & 4.06-4.17, (s, 2H,  $\text{O}-\text{CH}_2-\text{C}=\text{C}$ , EGDEMA polymer).

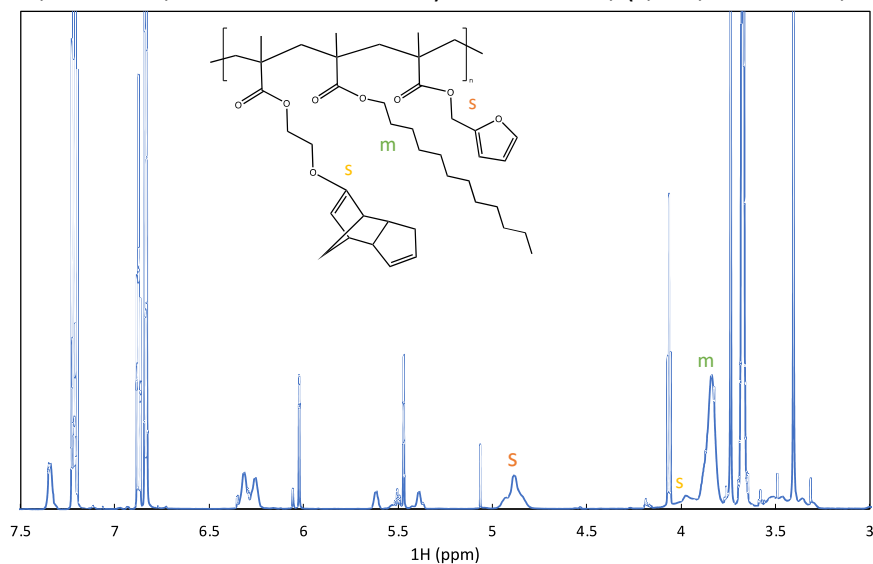

Figure S2.  $^1\text{H}$  NMR traces of Ter3: poly(EGDEMA-co-FMA-co-C13MA) synthesized by ICAR ATRP: 7.36-7.48(m, H,  $-\text{CH}=\text{CH}-$ , FMA monomer), 6.12-6.16 & 5.58-5.60 (m, 1H,  $-\text{CH}=\text{CH}-$ , EGDEMA monomer) & 6.05-6.12 & 5.51-5.56(d, 2H,  $-\text{CH}_2-\text{CH}=\text{C}-$ , C13MA monomer), 4.80-5.15(s, 2H,  $\text{O}-\text{CH}_2-\text{C}=\text{C}$ , FMA polymer), 4.06-4.17, (s, 2H,  $\text{O}-\text{CH}_2-\text{C}=\text{C}$ , EGDEMA polymer), 3.8-4.09(m, 2H,  $-\text{CH}_2-$ , C13MA polymer).

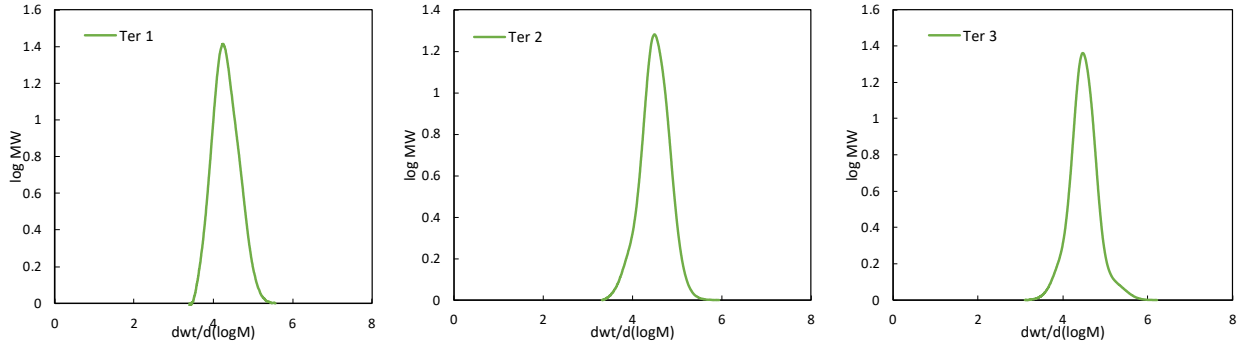

Figure S3. GPC traces for Ter1, Ter2 and Ter3.

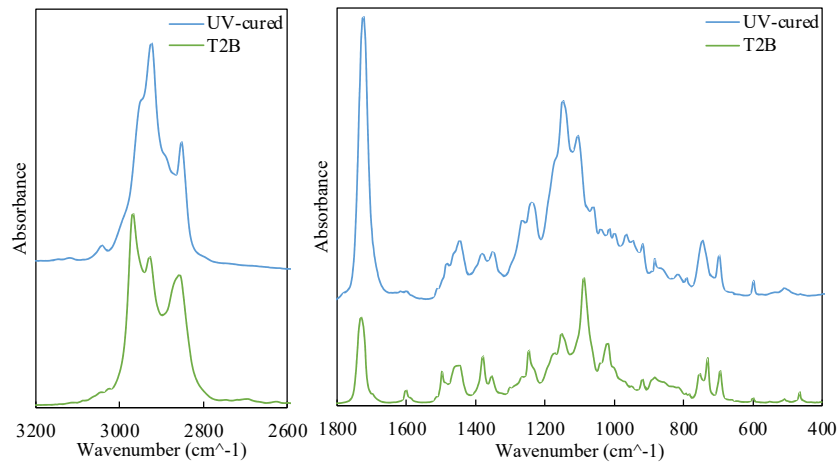

Figure S4. FTIR traces for crosslinked Ter2 sample with dual curing and BM:FMA loadings of 0.1 and TC:EGDEMA loading of 0.1.

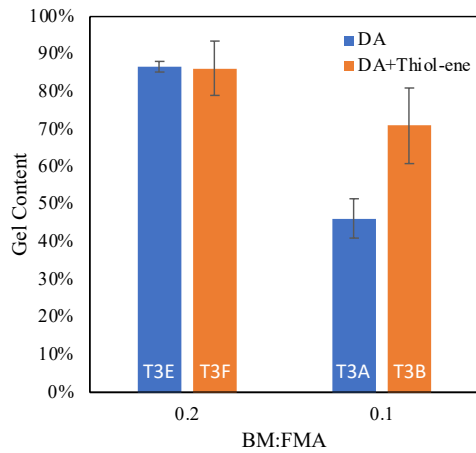

Figure S5. Gel content chart for UV-cured crosslinked Ter3 samples with single and dual curing and BM:FMA loadings of 0.1 and 0.2

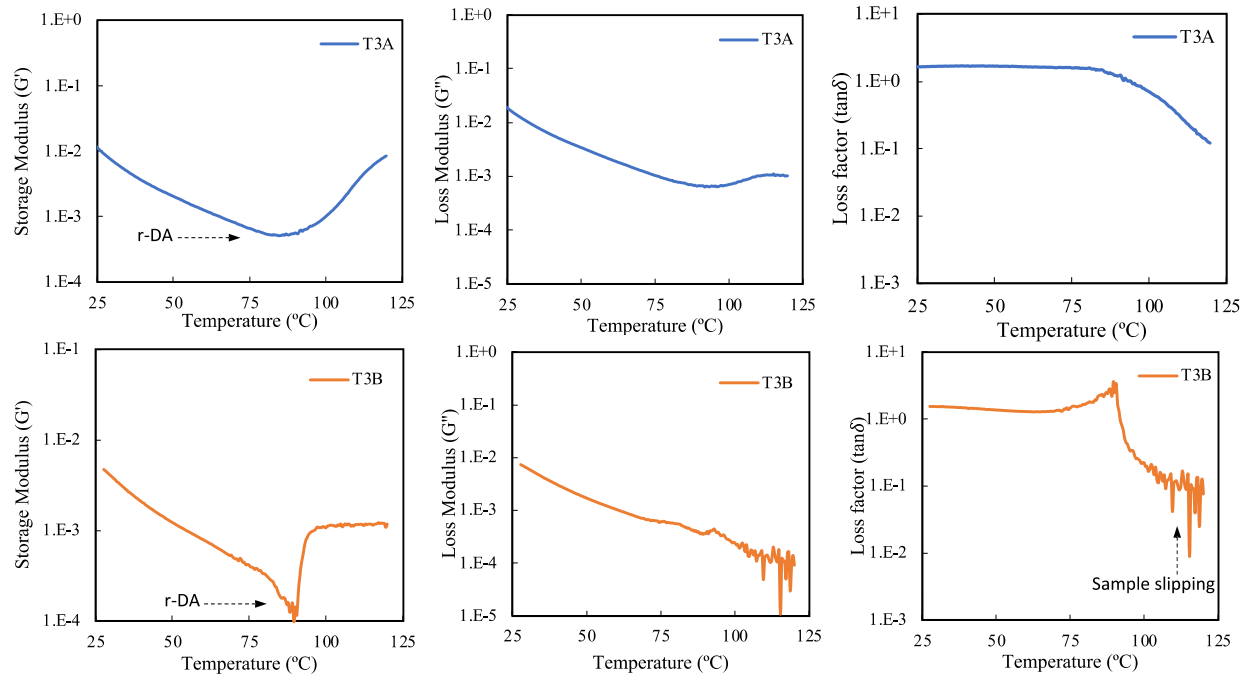

Figure S6. DMA test results for heating of single and dual crosslinked samples, T3A and T3B respectively, with BM:FMA ratio of 0.1; the reported values for  $G'$   $G''$  are in Pa.
